# Supplementary material for: Treatment of Cystic Fibrosis Patients Homozygous for F508del with Lumacaftor-Ivacaftor (Orkambi®) Restores Defective CFTR Channel Function in Circulating Mononuclear Cells
Source: MDPI journal article supplement (doi:10.3390/ijms21072398), 2020-03-31
Supplement: s1 [file s1]

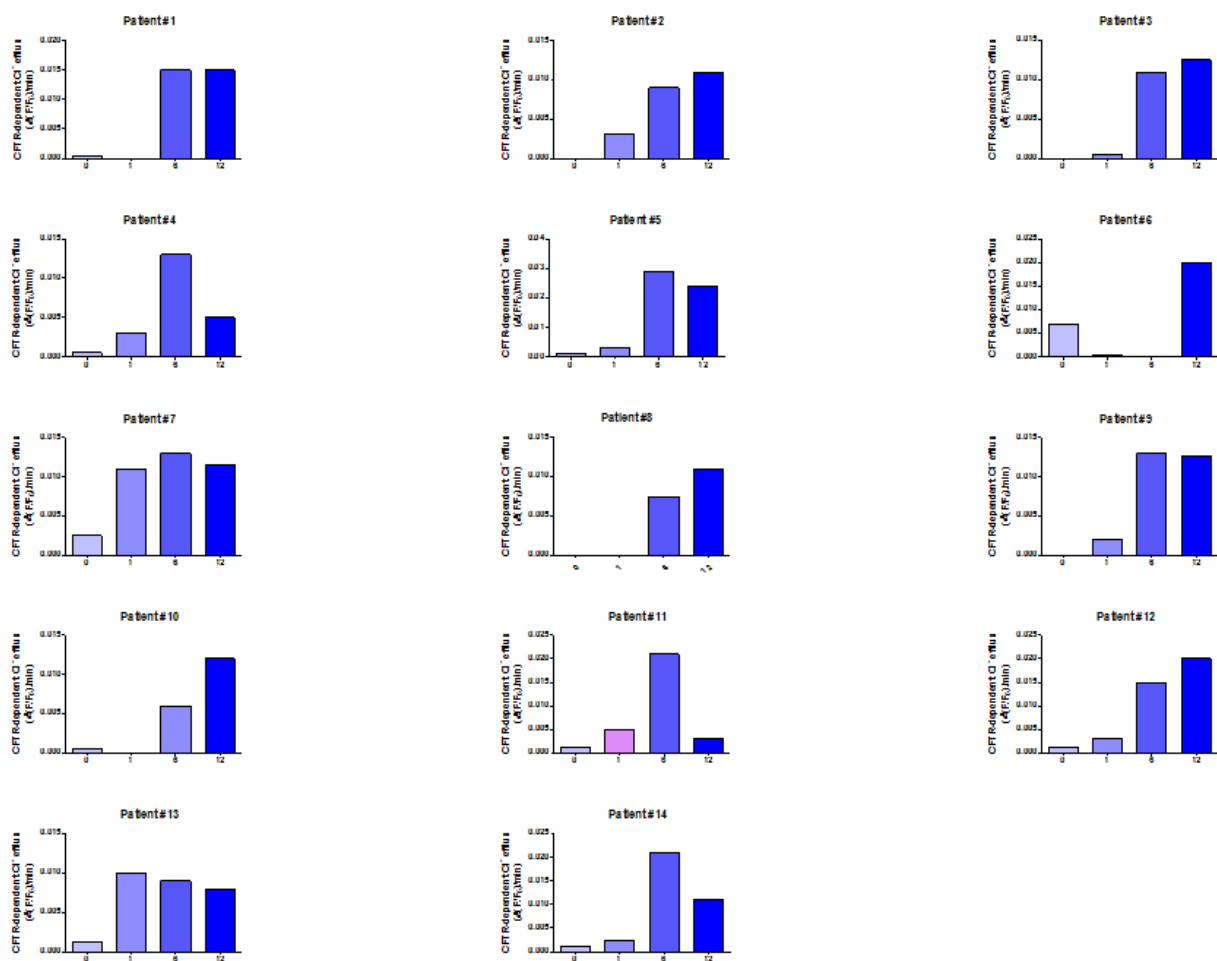

**Figure S1.** CFTR-dependent chloride efflux in circulating mononuclear cells. CFTR-dependent chloride efflux is shown in MNCs obtained from each CF patient at baseline (0), 1, 6, and 12 months from the beginning of Orkambi® treatment. While all patients are homozygous for the *F508del* mutation, patients #4 and patient #13 have also the *A238V* mutation in cis.
